# Supplementary material for: Strengthening Neonatal Care through Ward Assistants: A Kenyan Case Study in Enhancing Infection Prevention and Control Practices
Source: Research Square preprint supplement (doi:10.21203/rs.3.rs-6194020/v1), 2025-03-27
Supplement: Supplementary file 1 [file e749189866f8e8be3f56cc40.docx]

Supplementary Material

Appendix 1 Data collection Tool

| **SECTION** | | **QUESTION** | | **COMMENTS** |
| --- | --- | --- | --- | --- |
| **A** | Hygiene in the newborn unit | 1 | On what occasions do mothers/caregivers wash their hands?   1. before holding the baby   1 Never 2 Rarely 3 Occasionally 4 Often 5 Always |  |
| 1. before breastfeeding/feeding the baby   1 Never 2 Rarely 3 Occasionally 4 Often 5 Always |  |
| 1. after changing the baby’s diaper/nappy   1 Never 2 Rarely 3 Occasionally 4 Often 5 Always |  |
| 1. after touching hospital surfaces or equipment   1 Never 2 Rarely 3 Occasionally 4 Often 5 Always |  |
| 1. Other? (Describe the other besides I-IV above)   1 Never 2 Rarely 3 Occasionally 4 Often 5 Always 6. None/Not Applicable |  |
| 1. Baby feeding cups/syringes are cleaned through a decontamination process   1 Never 2 Rarely 3 Occasionally 4 Often 5 Always |  |
| 1. Baby nasal prongs; Oxygen/suction tubes; pigeon suckers/aspirators are cleaned through a decontamination process   1 Never 2 Rarely 3 Occasionally 4 Often 5 Always |  |
| 2 | Is there continuous supply of water and soap for handwashing in or around the wards?  1. Yes 2. No |  |
| 3 | Is there continuous supply of single use hand towels at the handwashing station?  1. Yes 2. No |  |
| 4 | Are sinks for handwashing available and what is the cleanliness and functionality status?  1. Yes 2. No |  |
| 5 | Is there continuous supply of hand sanitizer in the ward?  1. Yes 2. No |  |
| 6 | Are there posters/charts on handwashing in the ward or hand washing stations? Proportion of sinks with hand hygiene materials on the wall?  1. Yes 2. No |  |
| 7 | Describe the cleanliness status of ward walls and floors:   |  |  | YES | NO | | --- | --- | --- | --- | | a) | Walls are visibly clean |  |  | | b) | Walls are visibly dusty/dirty |  |  | | c) | Painting on walls appear clean/fresh |  |  | | d) | Floors and horizontal work surfaces appear clean |  |  | | e) | Some floors and work surfaces appear clean, but others do not |  |  | | f) | Most floors and work surfaces are visibly dirty |  |  | |  |
| 8 | Describe the cleanliness status of beds and cots |  |
| 9 | Describe the cleanliness of changing bed linen & mothers’ gowns |  |
| 10 | Describe the cleanliness of the healthcare provider gowns/scrubs/coats |  |
| 11 | Describe the adequacy and cleanliness of Crocs/Sandals for both staff and mothers |  |
| **B** | 1. Clinical staff hygiene - **Nurses** | 12 | Are nurses performing hand hygiene before touching each baby? e.g., hand washing, alcohol hand rub or use of gloves  1 Never 2 Rarely 3 Occasionally 4 Often 5 Always |  |
| 13 | Are nurses hand washing or sanitizing before wearing a new pair of gloves?  (*This is before a clean or aseptic procedure*)  1 Never 2 Rarely 3 Occasionally 4 Often 5 Always |  |
| 14 | Are nurses wearing a new pair of gloves before conducting procedures e.g., drawing blood, inserting NG tube?  1 Never 2 Rarely 3 Occasionally 4 Often 5 Always |  |
| 15 | Are nurses hand washing or sanitizing their hands after touching a patient?  1 Never 2 Rarely 3 Occasionally 4 Often 5 Always |  |
| 16 | Are nurses hand washing after contact with patients’ body fluids?  1 Never 2 Rarely 3 Occasionally 4 Often 5 Always |  |
| 17 | Are nurses hand washing or sanitizing their hands after contact with a patient’s surrounding?   1. Never 2 Rarely 3 Occasionally 4 Often 5 Always |  |
| 1. Clinical staff hygiene - **Clinical Officers** | 18 | Are Clinical officers performing hand hygiene before touching each baby? e.g., hand washing, alcohol had rub or use of gloves  1 Never 2 Rarely 3 Occasionally 4 Often 5 Always |  |
| 19 | Are Clinical officers hand washing or sanitizing before wearing a new pair of gloves?  1 Never 2 Rarely 3 Occasionally 4 Often 5 Always |  |
| 20 | Are clinical staff wearing a new pair of gloves before conducting aseptic procedures e.g., drawing blood, giving injections?  1 Never 2 Rarely 3 Occasionally 4 Often 5 Always |  |
| 21 | Are Clinical officers hand washing or sanitizing their hands after touching a patient?  1 Never 2 Rarely 3 Occasionally 4 Often 5 Always |  |
| 22 | Are Clinical officers hand washing after contact with patients’ body fluids?  1 Never 2 Rarely 3 Occasionally 4 Often 5 Always |  |
| 23 | Are Clinical officers hand washing or sanitizing their hands after contact with a patient’s surrounding?   1. Never 2 Rarely 3 Occasionally 4 Often 5 Always |  |
|  | 1. Clinical staff hygiene - **Medical Officers** | 24 | Are doctors performing hand hygiene before touching each baby? e.g., hand washing, alcohol had rub or use of gloves  1 Never 2 Rarely 3 Occasionally 4 Often 5 Always |  |
| 25 | Are doctors hand washing or sanitizing before wearing a new pair of gloves?  1 Never 2 Rarely 3 Occasionally 4 Often 5 Always |  |
| 26 | Are doctors wearing a new pair of gloves before conducting aseptic procedures e.g., drawing blood, giving injections?  1 Never 2 Rarely 3 Occasionally 4 Often 5 Always |  |
| 27 | Are doctors hand washing or sanitizing their hands after touching a patient?  1 Never 2 Rarely 3 Occasionally 4 Often 5 Always |  |
| 28 | Are doctors hand washing after contact with patients’ body fluids?  1 Never 2 Rarely 3 Occasionally 4 Often 5 Always |  |
| 29 | Are doctors hand washing or sanitizing their hands after contact with a patient’s surrounding?  1 Never 2 Rarely 3 Occasionally 4 Often 5 Always |  |
| 1. Interns (MO/CO/NO) | 30 | Are interns performing hand hygiene before touching each baby? e.g., hand washing, alcohol had rub or use of gloves  1 Never 2 Rarely 3 Occasionally 4 Often 5 Always |  |
| 31 | Are interns hand washing or sanitizing before wearing a new pair of gloves?  1 Never 2 Rarely 3 Occasionally 4 Often 5 Always |  |
| 32 | Are interns wearing a new pair of gloves before conducting aseptic procedures e.g., drawing blood, giving injections?  1 Never 2 Rarely 3 Occasionally 4 Often 5 Always |  |
| 33 | Are interns hand washing or sanitizing their hands after touching a patient?  1 Never 2 Rarely 3 Occasionally 4 Often 5 Always |  |
| 34 | Are interns hand washing after contact with patients’ body fluids?  1 Never 2 Rarely 3 Occasionally 4 Often 5 Always |  |
| 35 | Are interns hand washing or sanitizing their hands after contact with a patient’s surrounding?  1 Never 2 Rarely 3 Occasionally 4 Often 5 Always |  |
| 1. **Students** | 36 | Are students performing hand hygiene before touching each baby? e.g., hand washing, alcohol had rub or use of gloves  1 Never 2 Rarely 3 Occasionally 4 Often 5 Always |  |
| 37 | Are students hand washing or sanitizing before wearing a new pair of gloves?  1 Never 2 Rarely 3 Occasionally 4 Often 5 Always |  |
| 38 | Are students wearing a new pair of gloves before conducting aseptic procedures e.g., drawing blood, giving injections?  1 Never 2 Rarely 3 Occasionally 4 Often 5 Always |  |
| 39 | Are students hand washing or sanitizing their hands after touching a patient?  1 Never 2 Rarely 3 Occasionally 4 Often 5 Always |  |
| 40 | Are students hand washing after contact with patients’ body fluids?  1 Never 2 Rarely 3 Occasionally 4 Often 5 Always |  |
| 41 | Are students hand washing or sanitizing their hands after contact with a patient’s surrounding?  1 Never 2 Rarely 3 Occasionally 4 Often 5 Always |  |
| **C** | Covid-19 prevention measures  **(Describe)** | 42 | Wearing face masks  1 Never 2 Rarely 3 Occasionally 4 Often 5 Always |  |
| 43 | Social distancing  1 Never 2 Rarely 3 Occasionally 4 Often 5 Always |  |
| 44 | Limiting number of visitors (inquire about unit rules on visitors)  1 Never 2 Rarely 3 Occasionally 4 Often 5 Always |  |
| 45 | No handshaking  1 Never 2 Rarely 3 Occasionally 4 Often 5 Always |  |
| 46 | Availability of posters and other information, communication, and education materials on Covid-19 in the newborn ward  1. Yes 2. No |  |
| 47 | Sanitizing/cleaning of commonly touched surfaces e.g., door handles, tables, trolleys, bed rails and frames  1 Never 2 Rarely 3 Occasionally 4 Often 5 Always |  |
| **D** | Equipment use | 48 | **Contact thermometer** (should be cleaned with alcohol before /after every patient use) For contact thermometers, record the proportion of babies where the thermometer was cleaned before use.  **NOTE:** IF THEY USE THERMOGUNS CLEARLY STATE SO |  |
| 49 | **Stethoscope:** It should be cleaned with alcohol before /after every patient use. Record the proportion of babies where the stethoscope was cleaned before use. |  |
| 50 | **Pulse oximeter:** It should be cleaned with alcohol before /after every patient use). Record the proportion of babies where the POX was cleaned before use. |  |
| 51 | **Incubators:**  Is a cleaning rota available? 1. Yes 2. No  Is there an instruction sheet stating how the equipment should be cleaned?  1. Yes 2. No  While in the ward, were the incubators cleaned?  1. Yes 2. No |  |
| 52 | **Continuous positive airway pressure machine (CPAP):**  Is a cleaning rota available? 1. Yes 2. No  Is there an instruction sheet stating how the equipment should be cleaned?  1. Yes 2. No  While in the ward, were the CPAP machines cleaned?  1. Yes 2. No |  |
| 53 | **Oxygen concentrator:**  Is a cleaning rota available? 1 Yes 2 No  Is there an instruction sheet stating how the machine should be cleaned? 1 Yes 2 No  While in the ward, was the machine cleaned? 1 Yes 2 No |  |
| 54 | **Phototherapy device:**  Is a cleaning rota available? 1 Yes 2 No  Is there an instruction sheet stating how the machine should be cleaned? 1 Yes 2 No  While in the ward, were the devices cleaned? 1 Yes 2 No |  |
| 55 | **Radiant warmer:**  Is the cleaning rota available? 1 Yes 2 No  Is there an instruction sheet stating how the machine should be cleaned? 1 Yes 2 No  While in the ward, were radiant warmers cleaned?  1 Yes 2 No |  |
| **E** | Equipment sharing | 56 | Are babies sharing cots with other babies?  1 Yes 2 No |  |
| 57 | Are babies sharing incubators?  1 Yes 2 No |  |
| 58 | Are babies sharing phototherapy devices?  1 Yes 2 No |  |
| 59 | Are babies sharing radiant warmers?  1 Yes 2 No |  |
| **F** | Waste disposal  **CODE**  **Black** - Non-infectious waste  **Yellow** - Infectious waste  **Red** - Highly infectious waste | 60 | Are waste segregation bins **available** and **correctly labelled**?   |  |  | YES | NO | | --- | --- | --- | --- | | a) | Non-Infectious/General waste (Black) Bin |  |  | | b) | Infectious waste (Yellow) Bin |  |  | | c) | Highly Infectious waste (Red) Bin |  |  | | e) | Sharps box/containers |  |  | | f) | Other bin(s) present (*describe*) |  |  | |  | Specify other bins (above) ………………………………………………… | | | |  |
| 61 | Presence of functional waste collection bins:   |  |  | YES | NO | | --- | --- | --- | --- | | a) | Is waste is correctly segregated in the bins? (*check the bins*) waste |  |  | | d) | At least one of the above waste bins is > **¾** full |  |  | | e) | Sharps box/containers are near waste generation points) |  |  | | f) | Sharps box/container is > **¾** full |  |  | | g) | Are pictures of waste segregation available next to the waste collection bins? |  |  | |  |
| **G** | Decontamination of equipment and devices | 64 | 1. Decontamination buckets present in the unit:  |  | YES | NO | | --- | --- | --- | | 1. Chlorine solution |  |  | | 1. Soapy water |  |  | | 1. Clean (rinsing water) |  |  | | 1. The above decontamination buckets were prepared today |  |  | |  |
| 65 | Describe the cleanliness status of the basins/bowls used in top-tailing/cleaning the baby. |  |
| 66 | Describe how the cleaning of basins/bowls used to top-tail the baby is done. |  |

Appendix 2 Ward assistants Job description
